# Supplementary material for: In Vitro Antitumor Activity of Aloperine on Human Thyroid Cancer Cells through Caspase-Dependent Apoptosis
Source: PubMed Central journal article supplement (PMC5796256; doi:10.3390/ijms19010312), 2018-01-21
Supplement: ijms-19-00312-s001.pdf [file ijms-19-00312-s001.pdf]

# In Vitro Antitumor Activity of Aloperine on Human Thyroid Cancer Cells through Caspase-Dependent Apoptosis

Ying-Ray Lee, Shu-Hsin Chen, Ching-Yen Lin, Wen-Ying Chao, Yun-Ping Lim, Hui-I Yu, and Chieh-Hsiang Lu

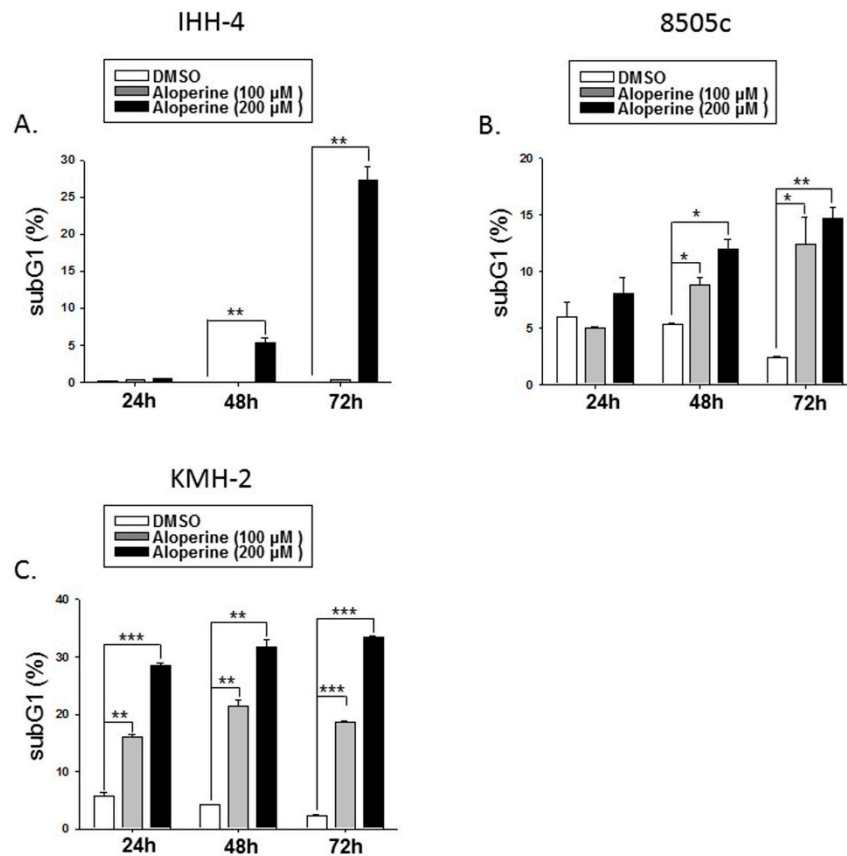

**Figure S1.** Sub-G1 induction of human thyroid cancer cells after aloperine treatment. (A) IHH-4 (B) 8505c and (C) KMH-2 cells were incubated with aloperine for 24, 48 and 72 h, and the cell cycle were determined by flow cytometry after PI staining. The sub-G1 population was determined and quantified. The data represent mean  $\pm$  SD of three separated experiments. DMSO was used as a negative control. \*  $p < 0.05$ , \*\*  $p < 0.01$ , \*\*\*  $p < 0.001$ .
